# Supplementary material for: Investigation of the Storage and Stability as Well as the Dissolution Rate of Novel Ilaprazole/Xylitol Cocrystal
Source: Pharmaceutics. 2024 Jan 17;16(1):122. doi: 10.3390/pharmaceutics16010122 (PMC10818325; doi:10.3390/pharmaceutics16010122)
Supplement: Supplementary file 1 [file pharmaceutics-16-00122-s001.zip › pharmaceutics-2831426-supplementary.pdf]

## Supporting Information

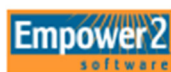

### Ilaprazole related substance

| SAMPLE INFORMATION |                            |                     |                              |
|--------------------|----------------------------|---------------------|------------------------------|
| Sample Name:       | IMP mixture                | Acquired By:        | System                       |
| Sample Type:       | Unknown                    | Sample Set Name:    | Ilaprazole related substance |
| Vial:              | 34                         | Acq. Method Set:    | Ilaprazole_related substance |
| Injection #:       | 1                          | Processing Method:  | Ilaprazole_related substance |
| Injection Volume:  | 10.00 ul                   | Channel Name:       | 237.0nm                      |
| Run Time:          | 30.0 Minutes               | Proc. Chnl. Descr.: | PDA 237.0 nm                 |
| Date Acquired:     | 2021-08-10 PM 3:04:04 KST  |                     |                              |
| Date Processed:    | 2021-08-11 AM 10:48:10 KST |                     |                              |

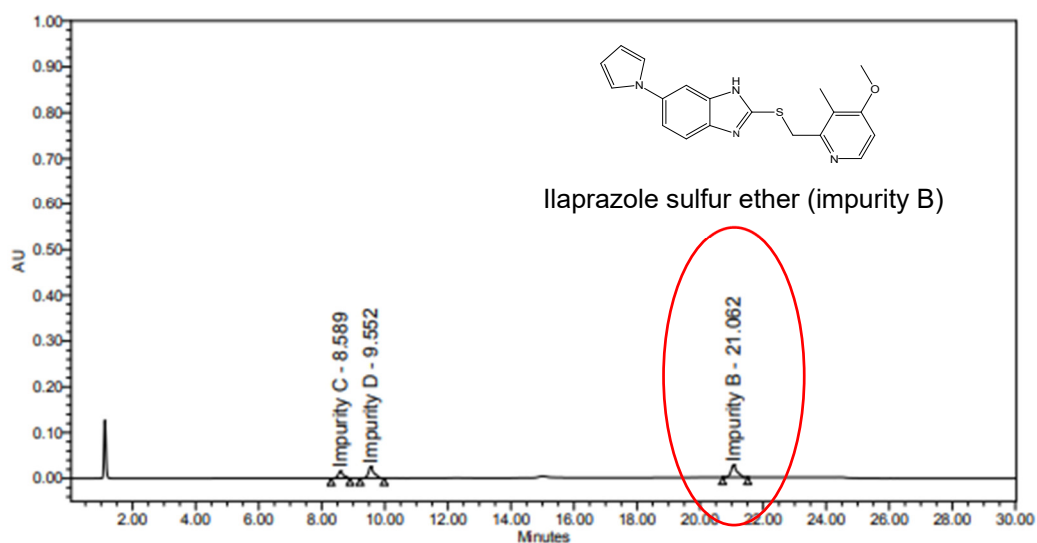

|   | Peak Name  | RT     | Area   | % Area | Height |
|---|------------|--------|--------|--------|--------|
| 1 | Impurity C | 8.589  | 170673 | 20.44  | 15180  |
| 2 | Impurity D | 9.552  | 305479 | 36.59  | 25735  |
| 3 | Ilaprazole | 15.780 |        |        |        |
| 4 | Impurity B | 21.062 | 358679 | 42.96  | 27079  |

**Figure S1.** Shows the chromatogram of Ilaprazole (Ila) impurity obtained through High-performance liquid chromatography (HPLC) analysis, depicting the retention time (RT). (RT: 21.062 min)

### SAMPLE INFORMATION

|                   |                            |                     |                              |
|-------------------|----------------------------|---------------------|------------------------------|
| Sample Name:      | STD_2                      | Acquired By:        | System                       |
| Sample Type:      | Unknown                    | Sample Set Name:    | Ilaprazole related substance |
| Vial:             | 38                         | Acq. Method Set:    | Ilaprazole_related substance |
| Injection #:      | 1                          | Processing Method:  | Ilaprazole_related substance |
| Injection Volume: | 10.00 ul                   | Channel Name:       | 237.0nm                      |
| Run Time:         | 30.0 Minutes               | Proc. Chnl. Descr.: | PDA 237.0 nm                 |
| Date Acquired:    | 2021-08-10 PM 4:05:57 KST  |                     |                              |
| Date Processed:   | 2021-08-11 AM 10:48:27 KST |                     |                              |

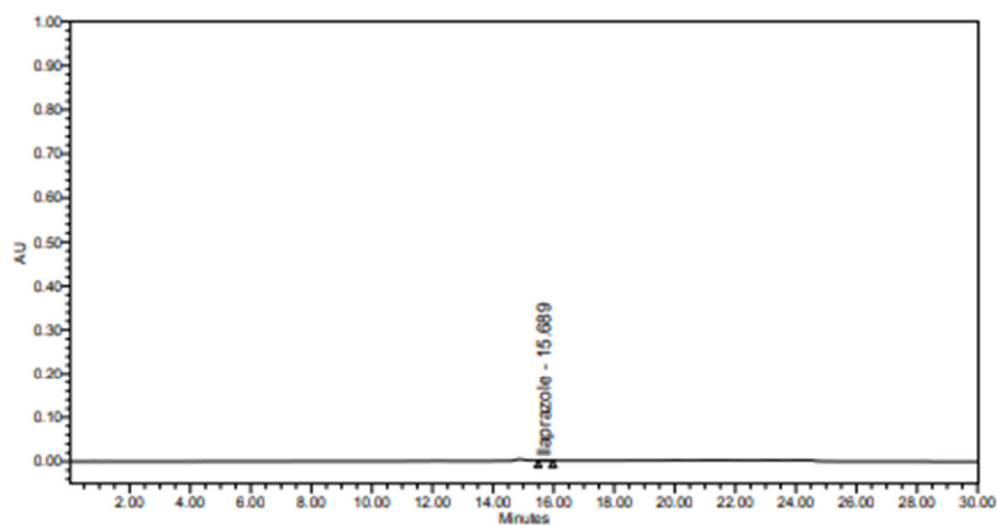

|   | Peak Name  | RT     | Area | % Area | Height |
|---|------------|--------|------|--------|--------|
| 1 | Impurity C | 8.580  |      |        |        |
| 2 | Impurity D | 9.550  |      |        |        |
| 3 | Ilaprazole | 15.689 | 7422 | 100.00 | 683    |
| 4 | Impurity B | 21.600 |      |        |        |

**Figure S2.** Shows the chromatogram of Ilaprazole (Ila) obtained through High-performance liquid chromatography (HPLC) analysis, depicting the retention time (RT). (RT: 15.689 min)

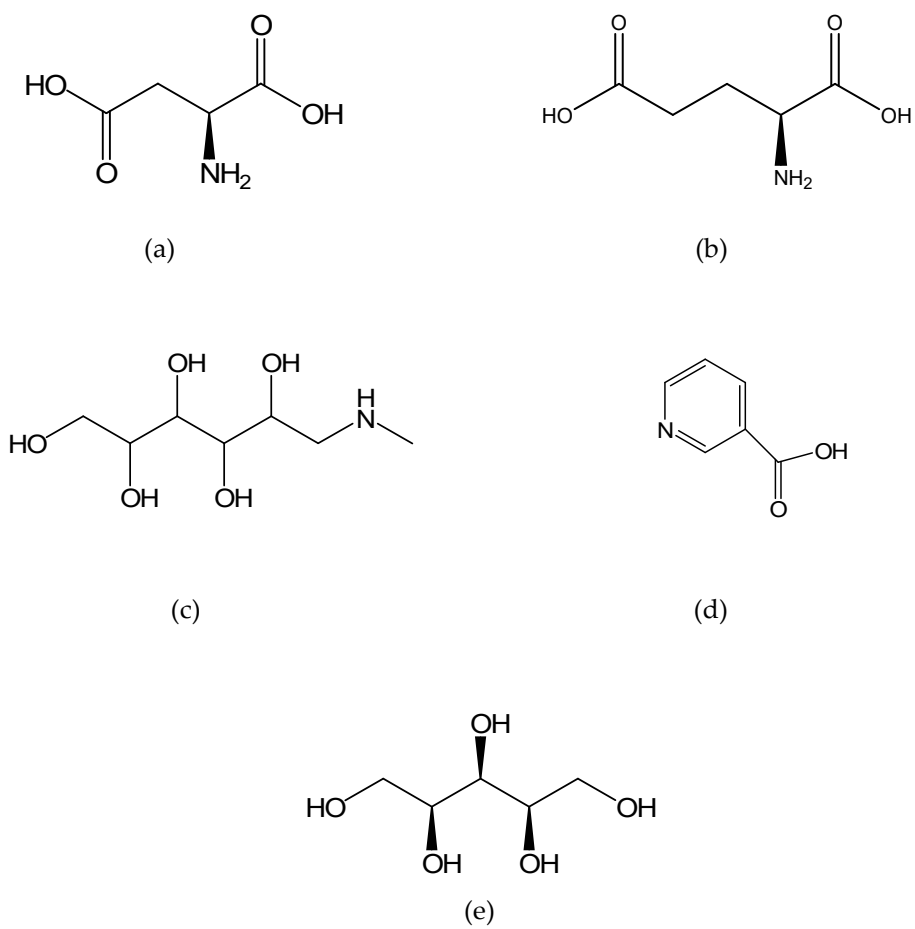

**Figure S3.** The molecular structures of the coformers presented in Table 1; (a) L-Aspartic acid (Asp); (b) L-Glutamic acid (Glu); (c) Meglumine (Meg); (d) Nicotinic acid (Nic); (e) Xylitol (Xyl)

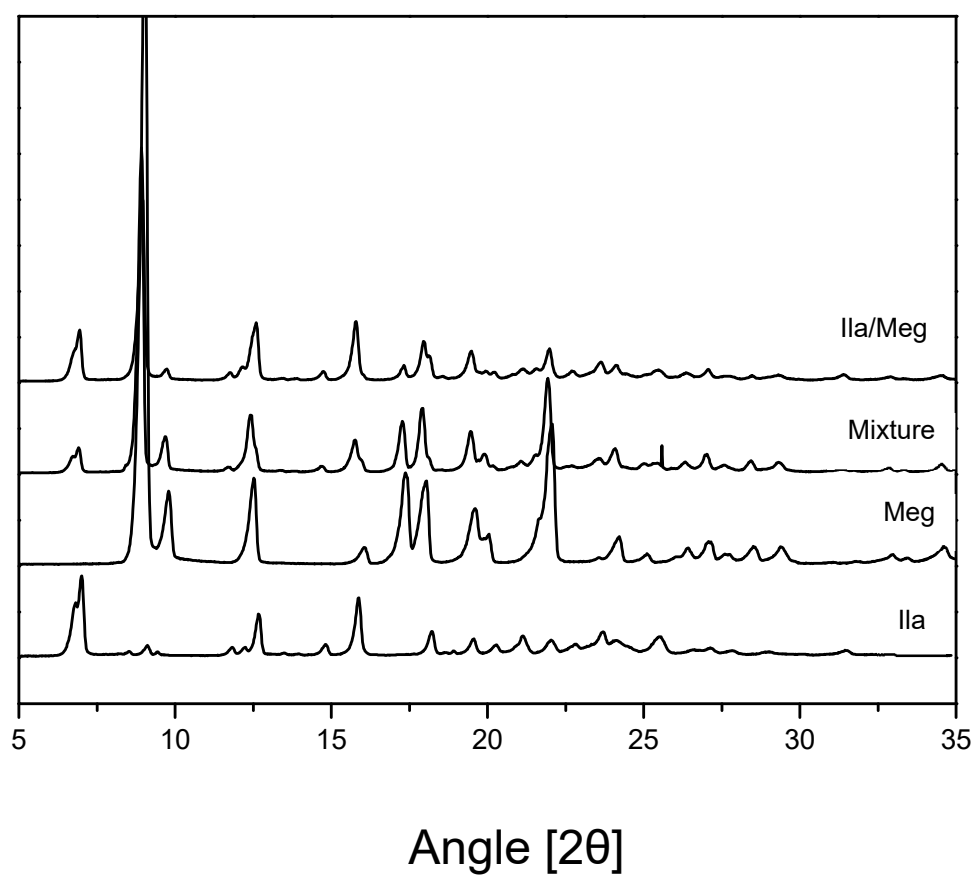

**Figure S4.** PXRD pattern of Ila, Meg, Ila/Meg physical mixture and Ila/Meg obtained by co-crystallization.

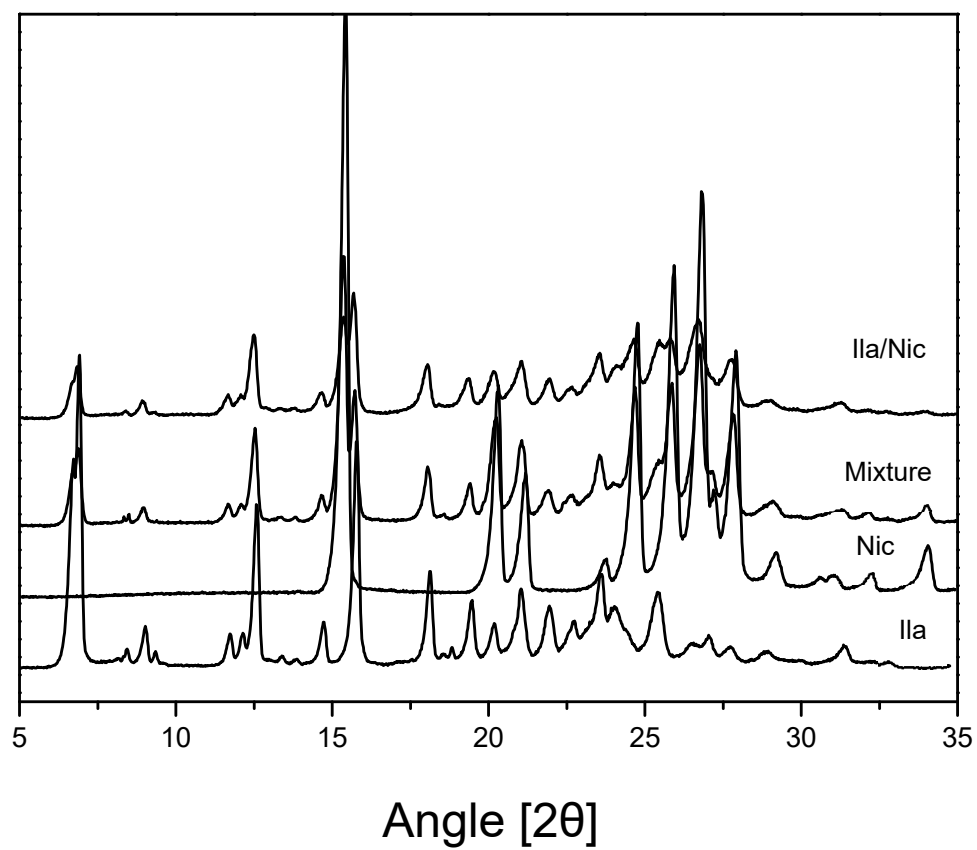

**Figure S5.** PXRD pattern of Ila, Nic, Ila/Nic physical mixture and Ila/Nic obtained by co-crystallization.

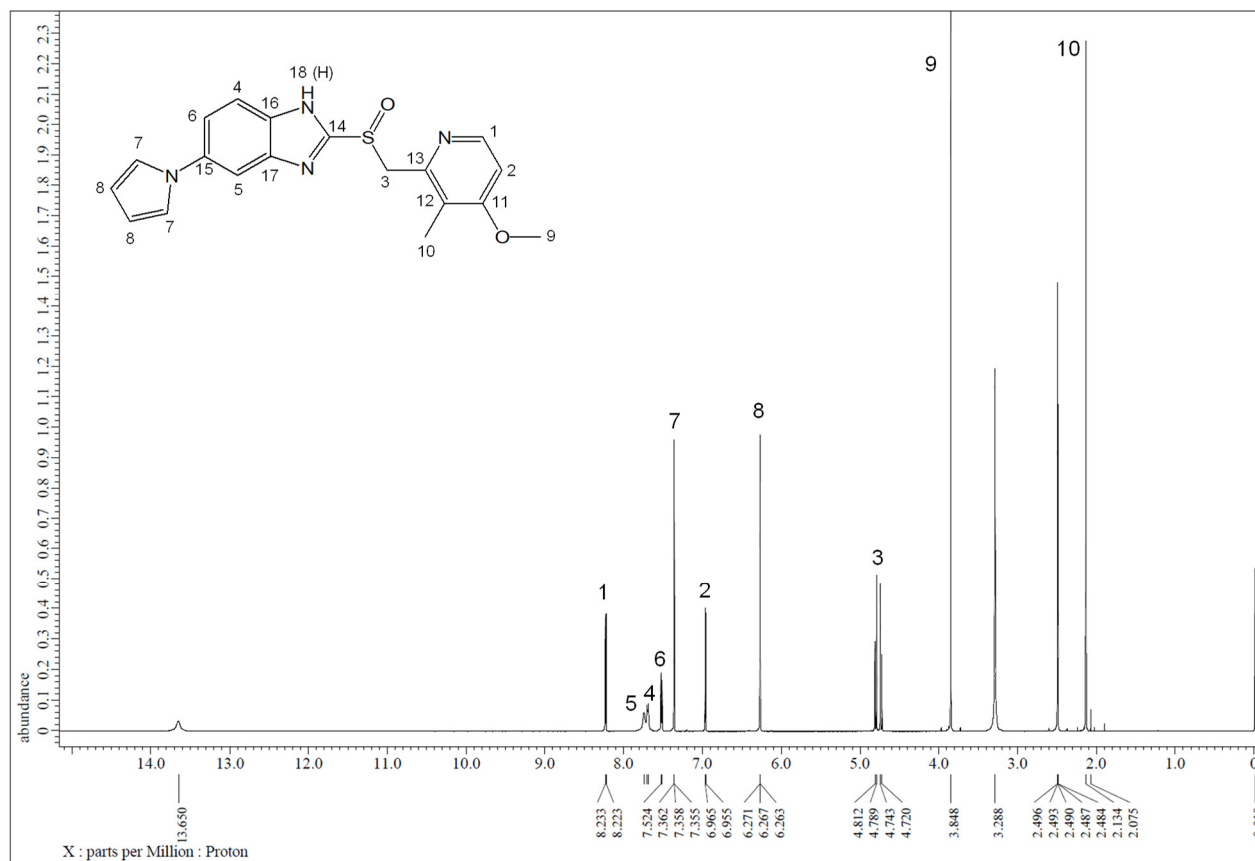

**Figure S6.** Solution-state  $^1\text{H}$ -NMR of Ilaprazole (IIa) (solvent: DMSO- $d_6$ ) (Hydrogen numbering for each peak has been completed.)

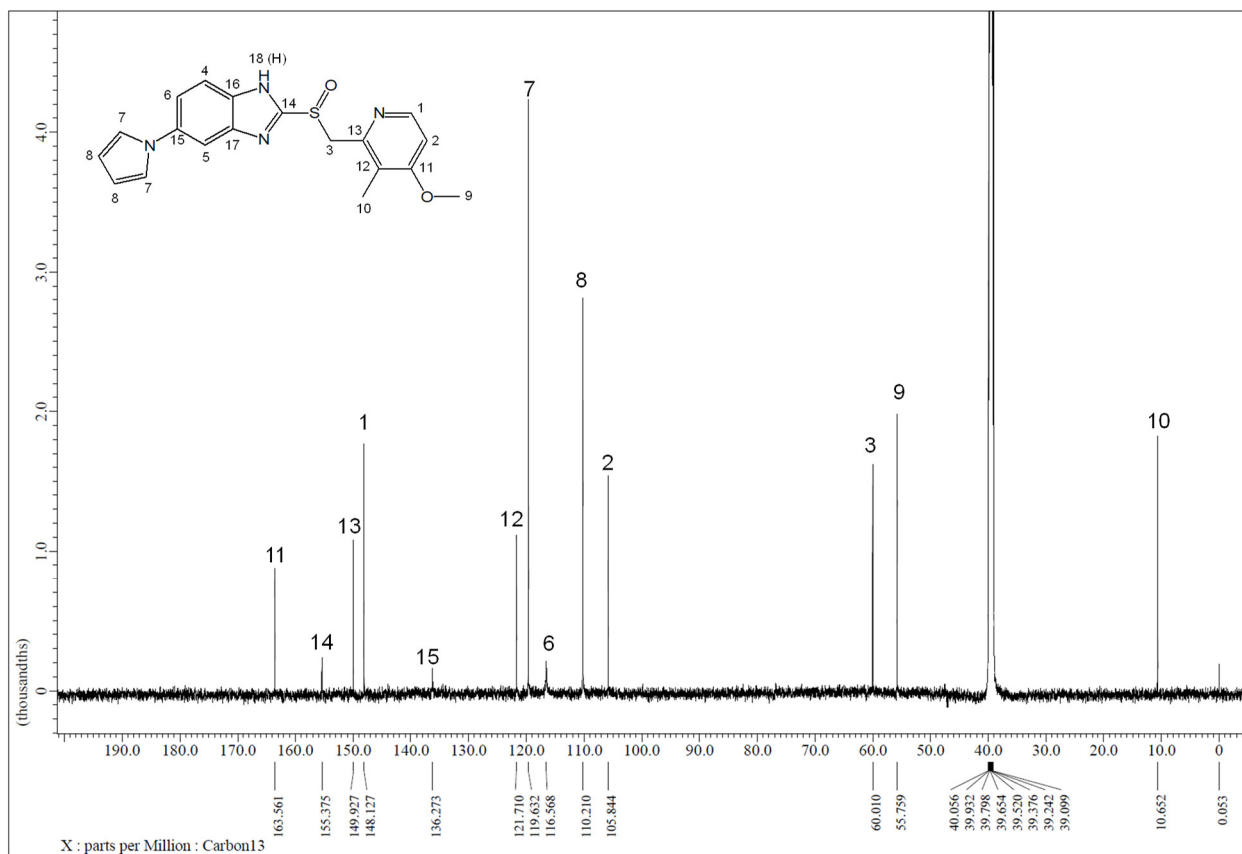

**Figure S7.** Solution-state  $^{13}\text{C}$ -NMR of Ilaprazole (IIa) (solvent: DMSO- $d_6$ ) (Carbon numbering for each peak has been completed.)

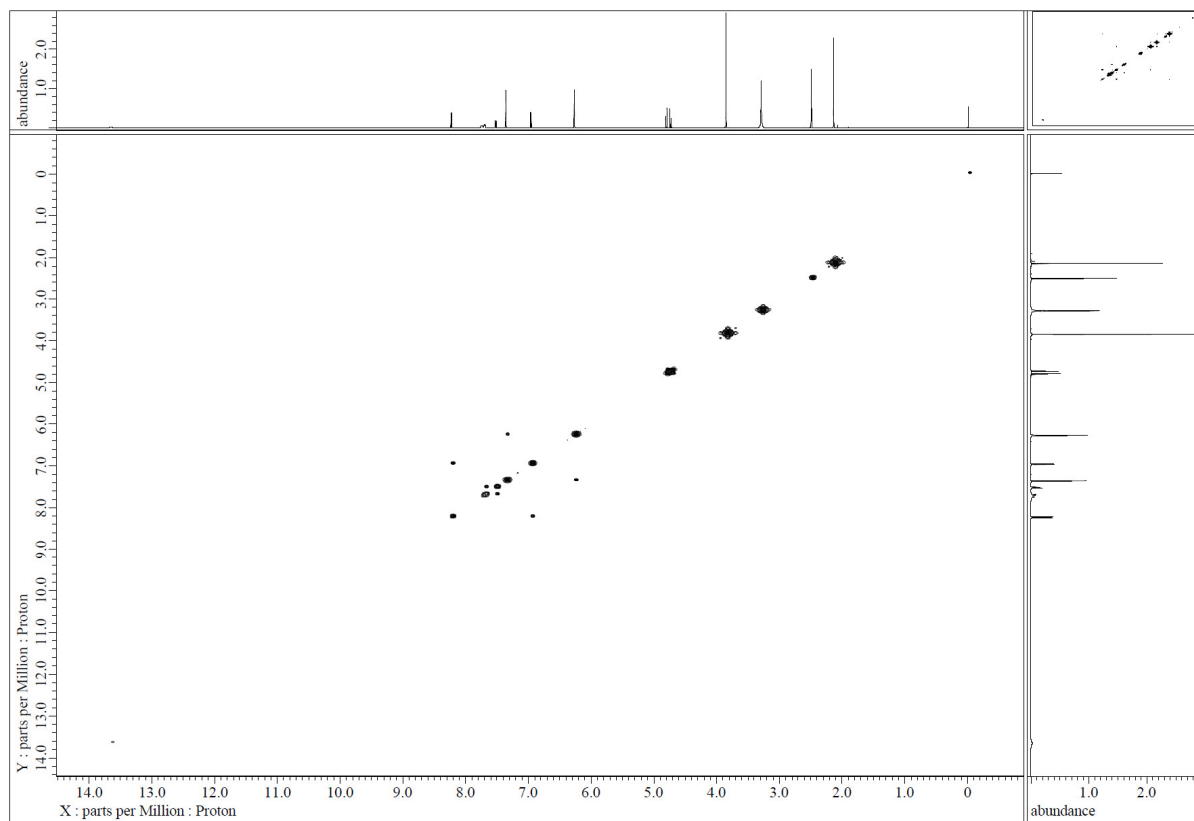

**Figure S8.** Solution-state 2D NMR ( $^1\text{H}$ - $^1\text{H}$  COSY) of Ilaprazole (IIa)

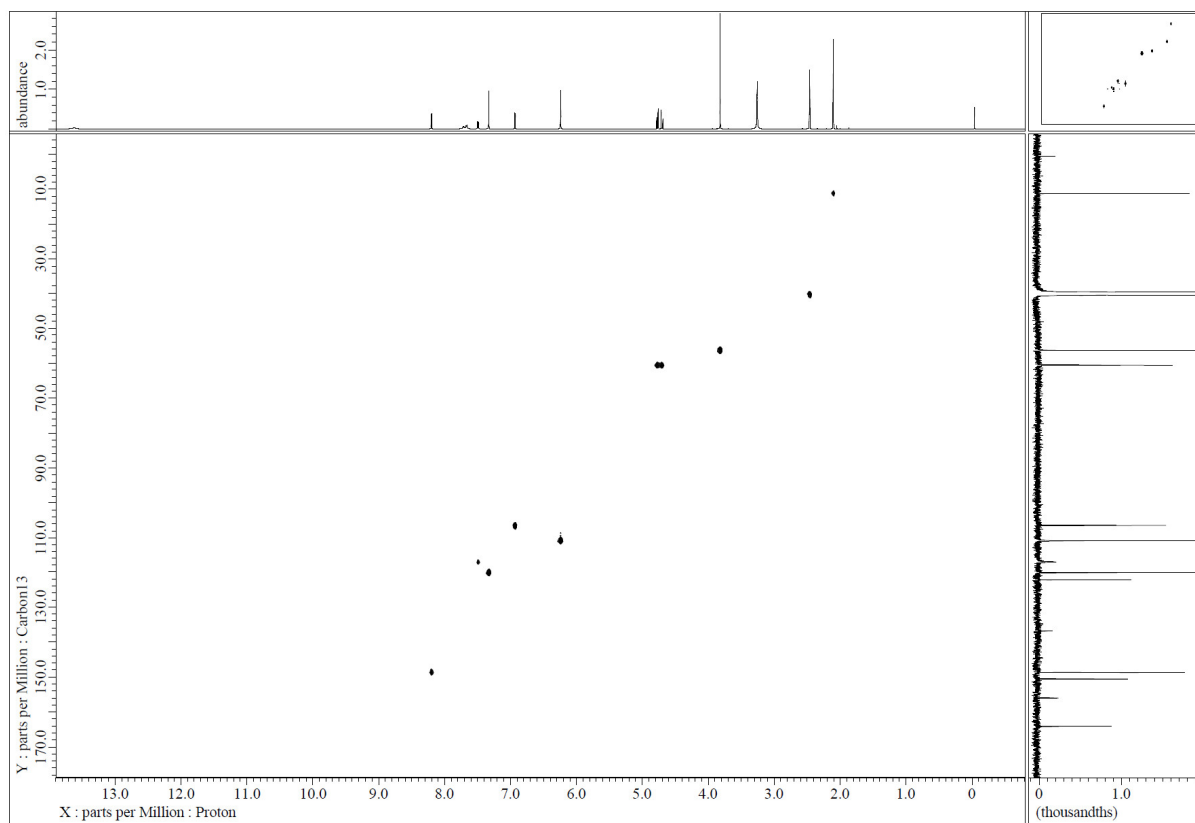

**Figure S9.** Solution-state 2D NMR ( $^1\text{H}$ - $^{13}\text{C}$  HSQC) of Ilaprazole (IIa)

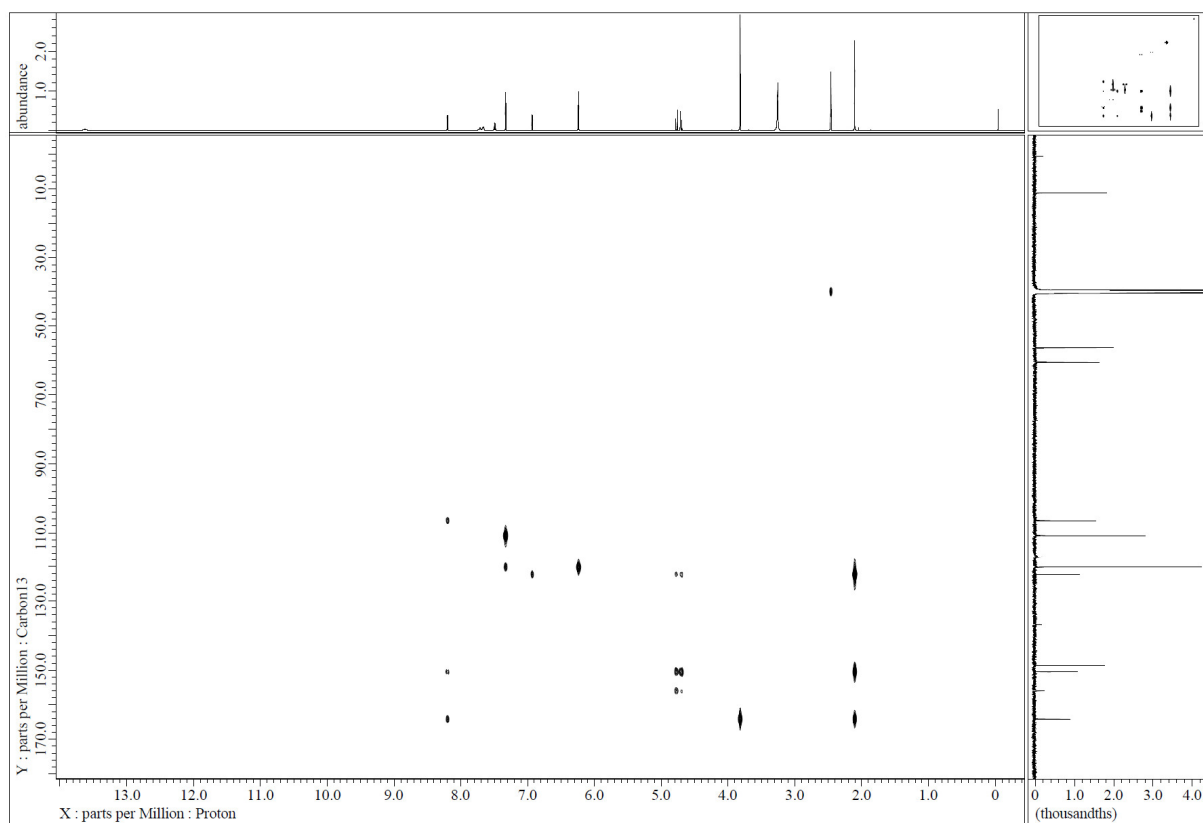

**Figure S10.** Solution-state 2D NMR ( $^1\text{H}$ - $^{13}\text{C}$  HMBC) of Ilaprazole (IIa)

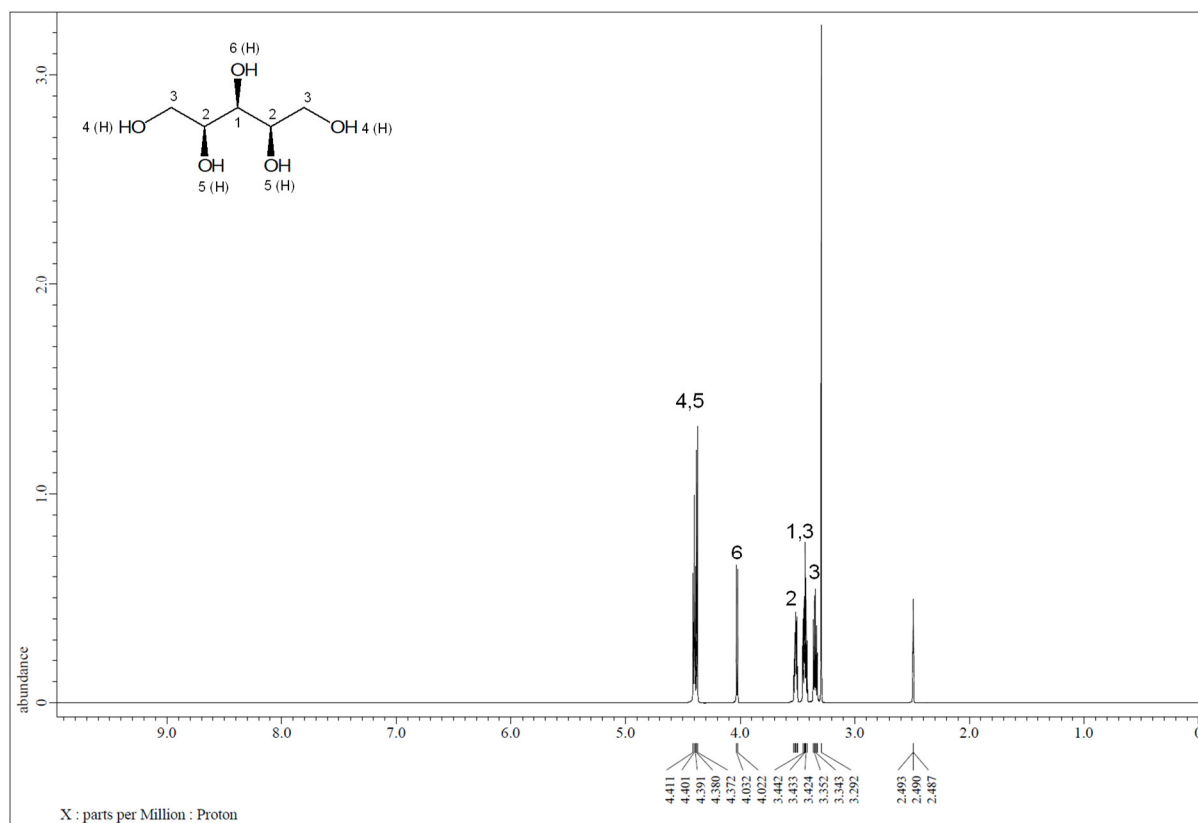

**Figure S11.** Solution-state <sup>1</sup>H-NMR of Xylitol (Xyl) (solvent: DMSO-d<sub>6</sub>) (Hydrogen numbering for each peak has been completed.)

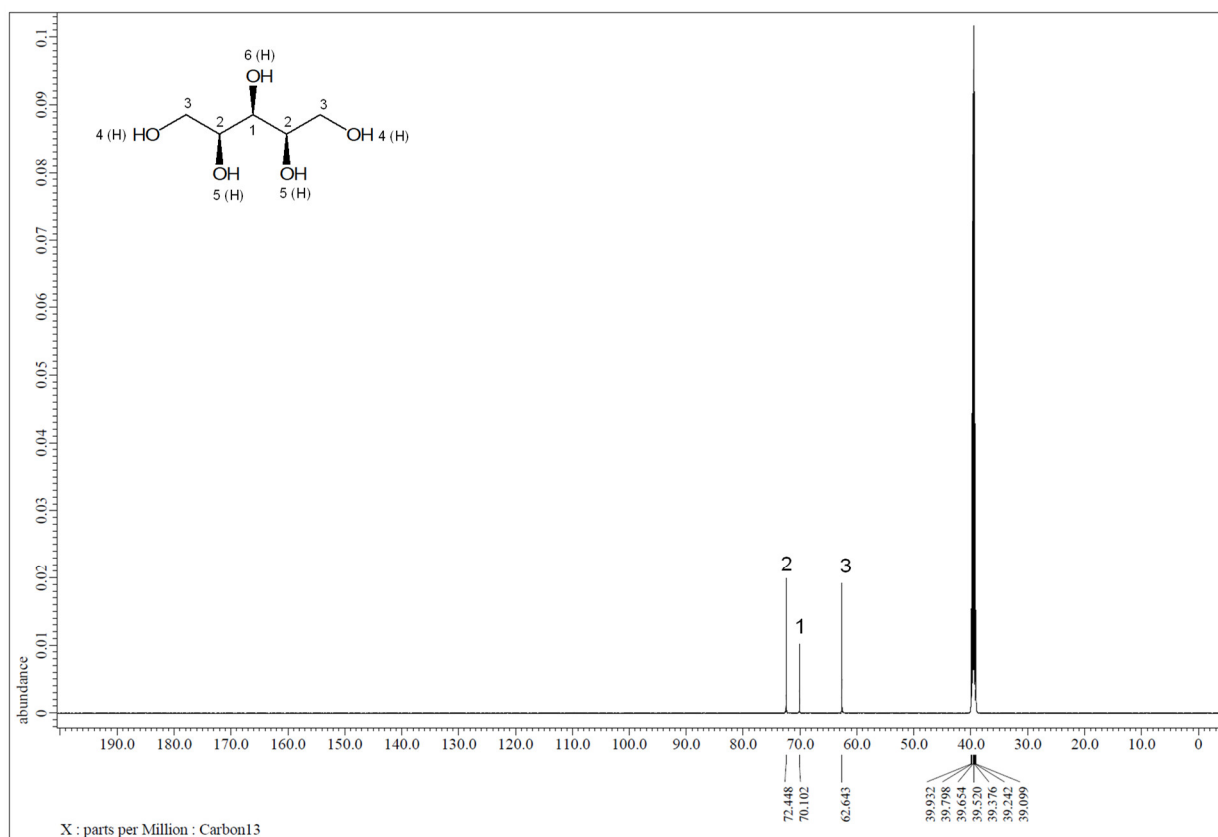

**Figure S12.** Solution-state  $^{13}\text{C}$ -NMR of Xylitol (Xyl) (solvent:  $\text{DMSO-d}_6$ ) (Hydrogen numbering for each peak has been completed.)

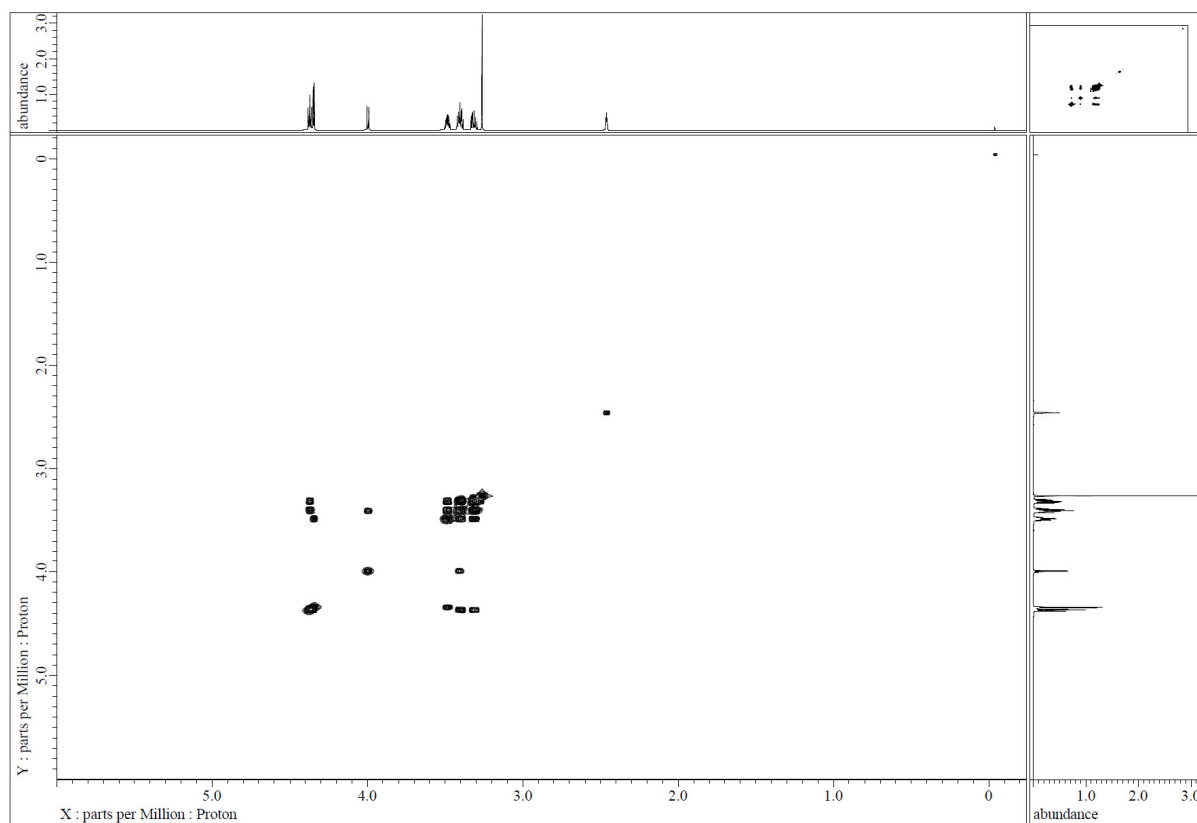

**Figure S13.** Solution-state 2D NMR ( $^1\text{H}$ - $^1\text{H}$  COSY) of Xylitol (Xyl)

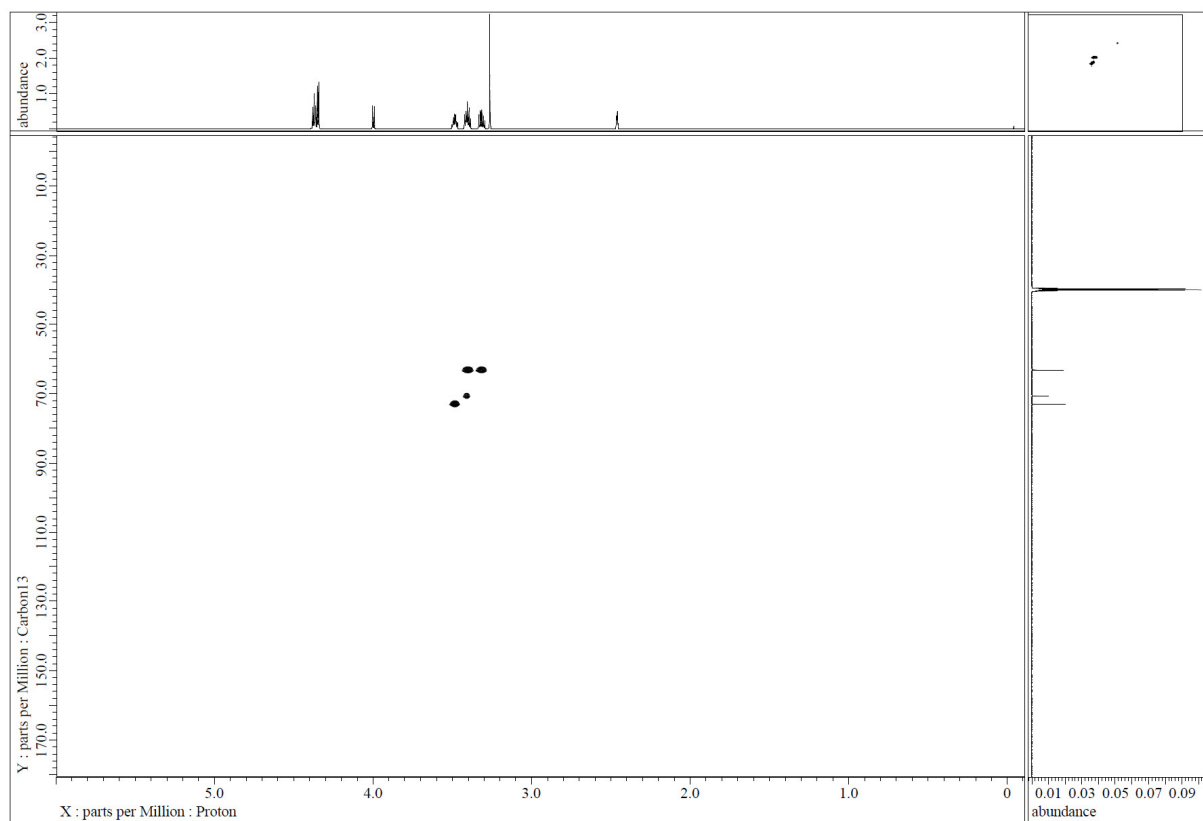

**Figure S14.** Solution-state 2D NMR ( $^1\text{H}$ - $^{13}\text{C}$  HSQC) of Xylitol (Xyl)

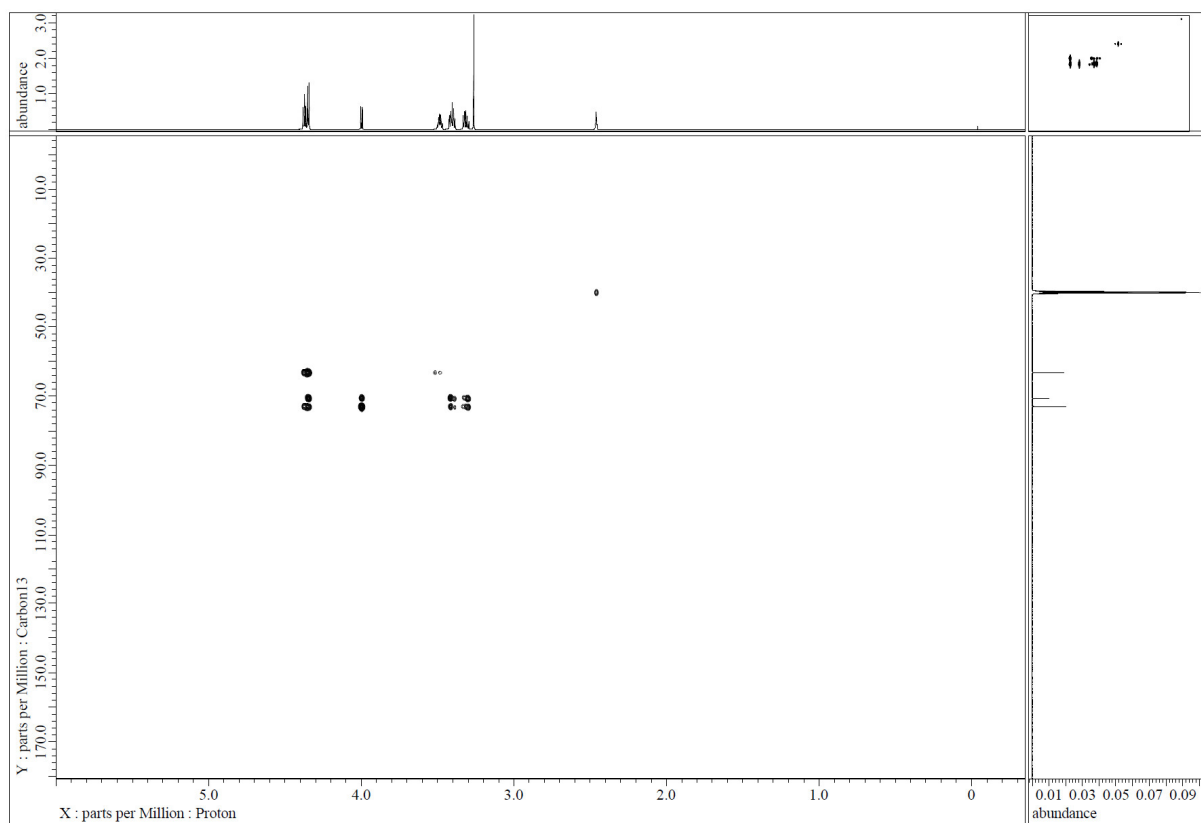

**Figure S15.** Solution-state 2D NMR ( $^1\text{H}$ - $^{13}\text{C}$  HMBC) of Xylitol (Xyl)

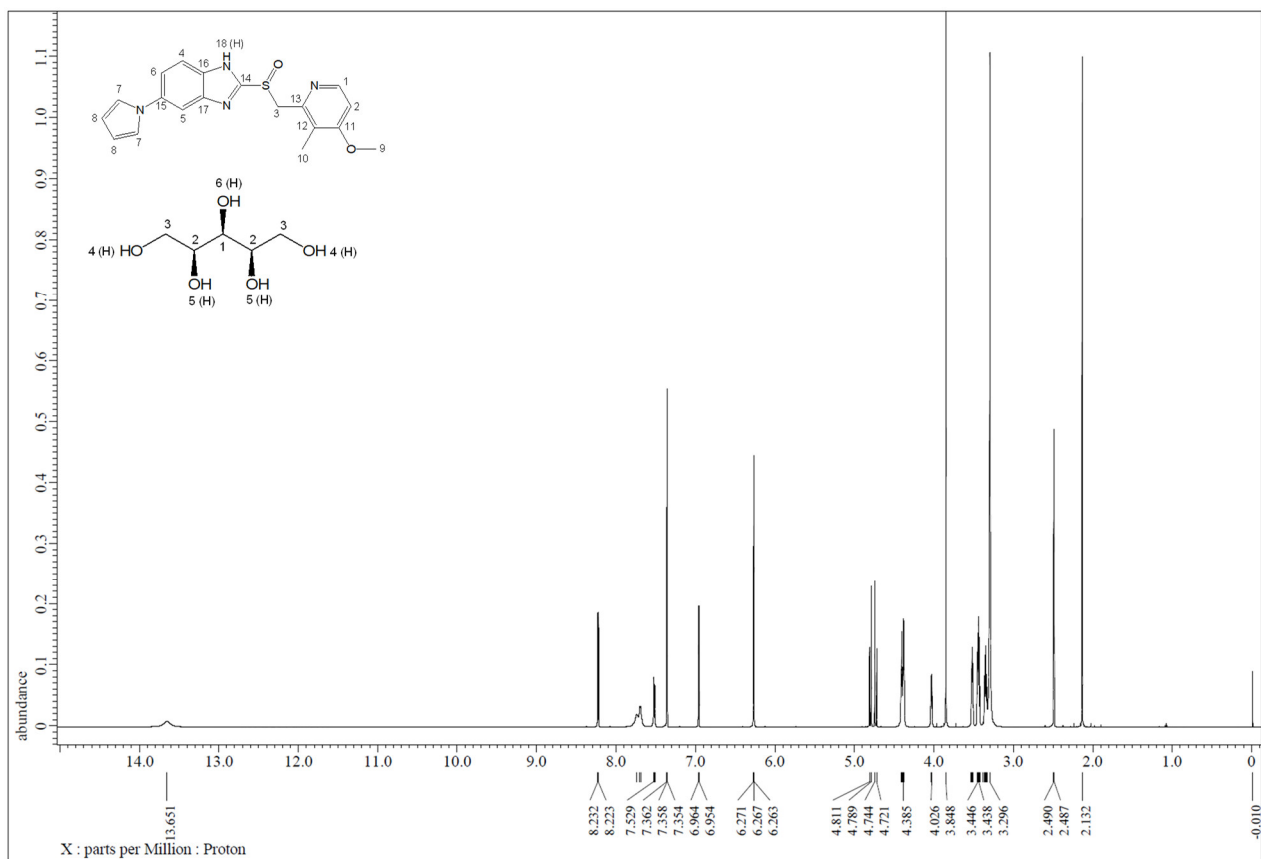

**Figure S16.** Solution-state  $^1\text{H}$ -NMR of Ila/Xyl cocrystal (solvent:  $\text{DMSO-d}_6$ )

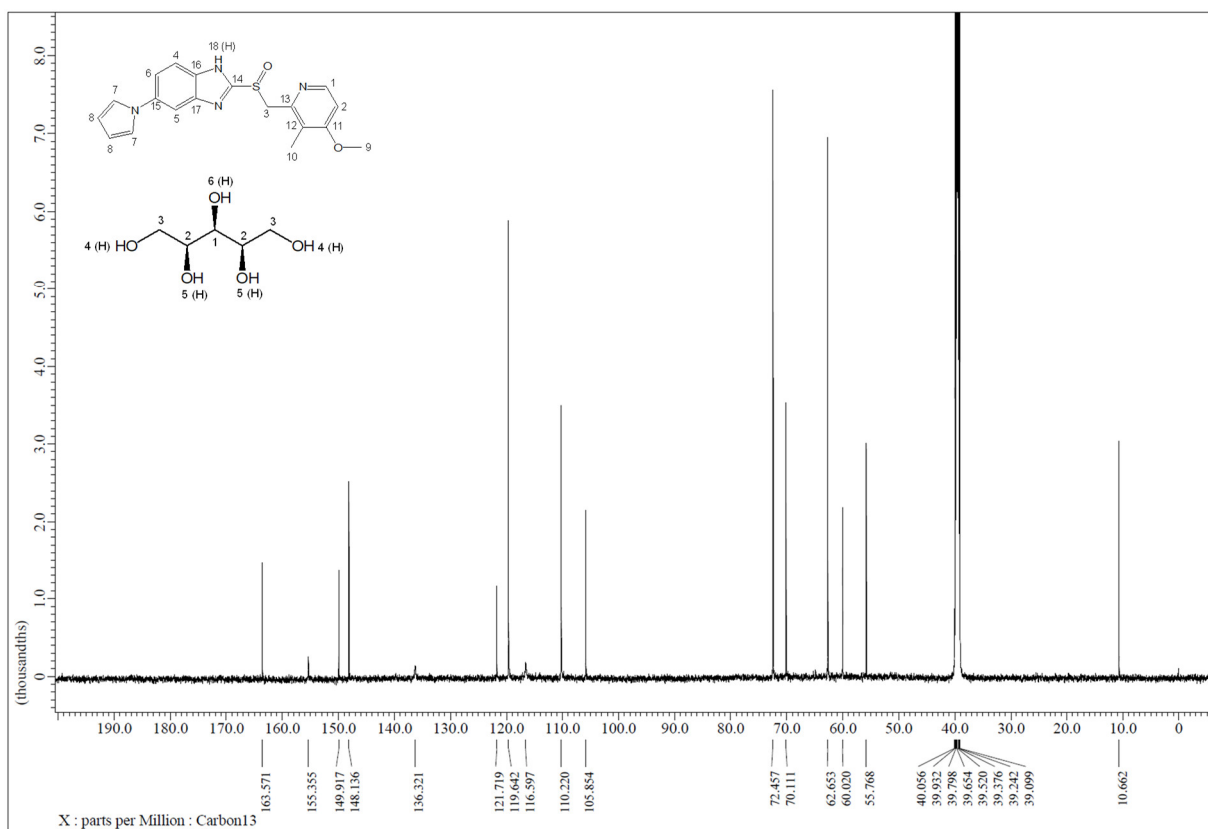

**Figure S17.** Solution-state <sup>13</sup>C-NMR of Ila/Xyl cocrystal (solvent: DMSO-d<sub>6</sub>)

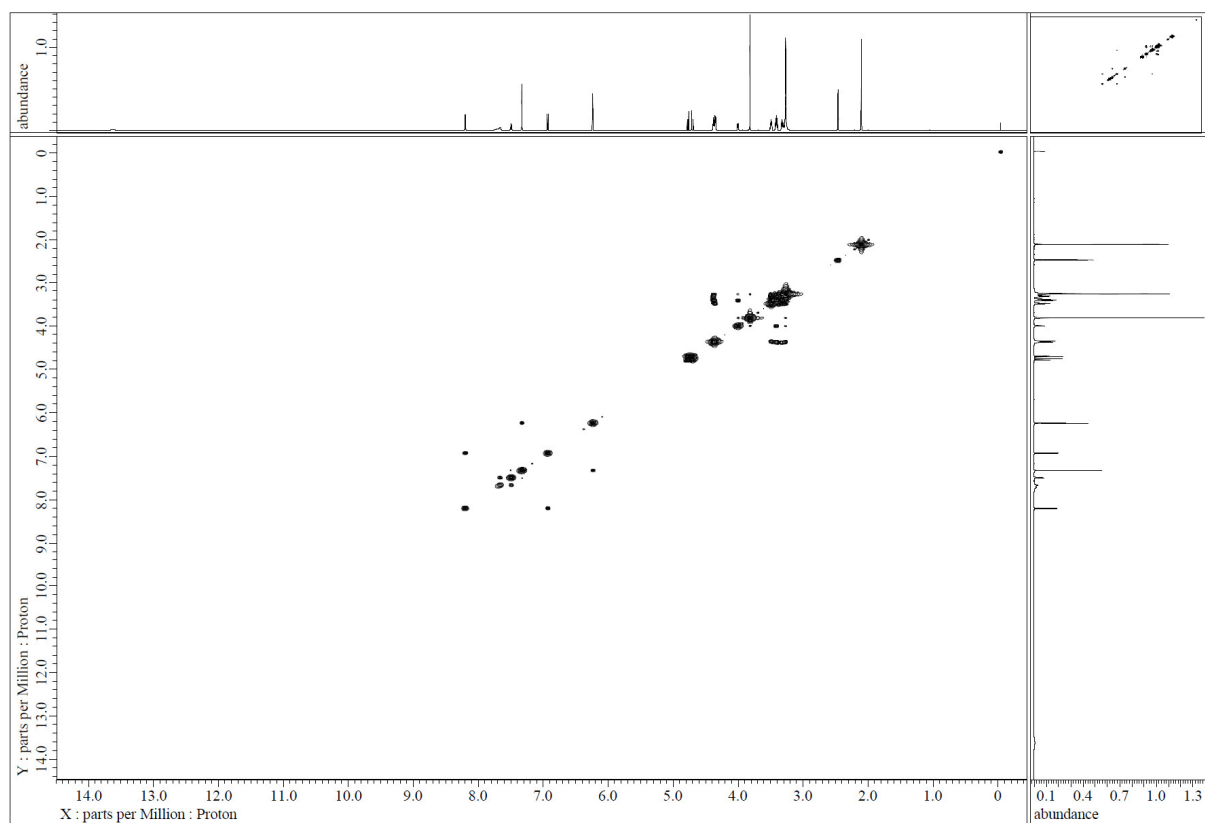

**Figure S18.** Solution-state 2D NMR ( $^1\text{H}$ - $^1\text{H}$  COSY) of Ila/Xyl cocrystal

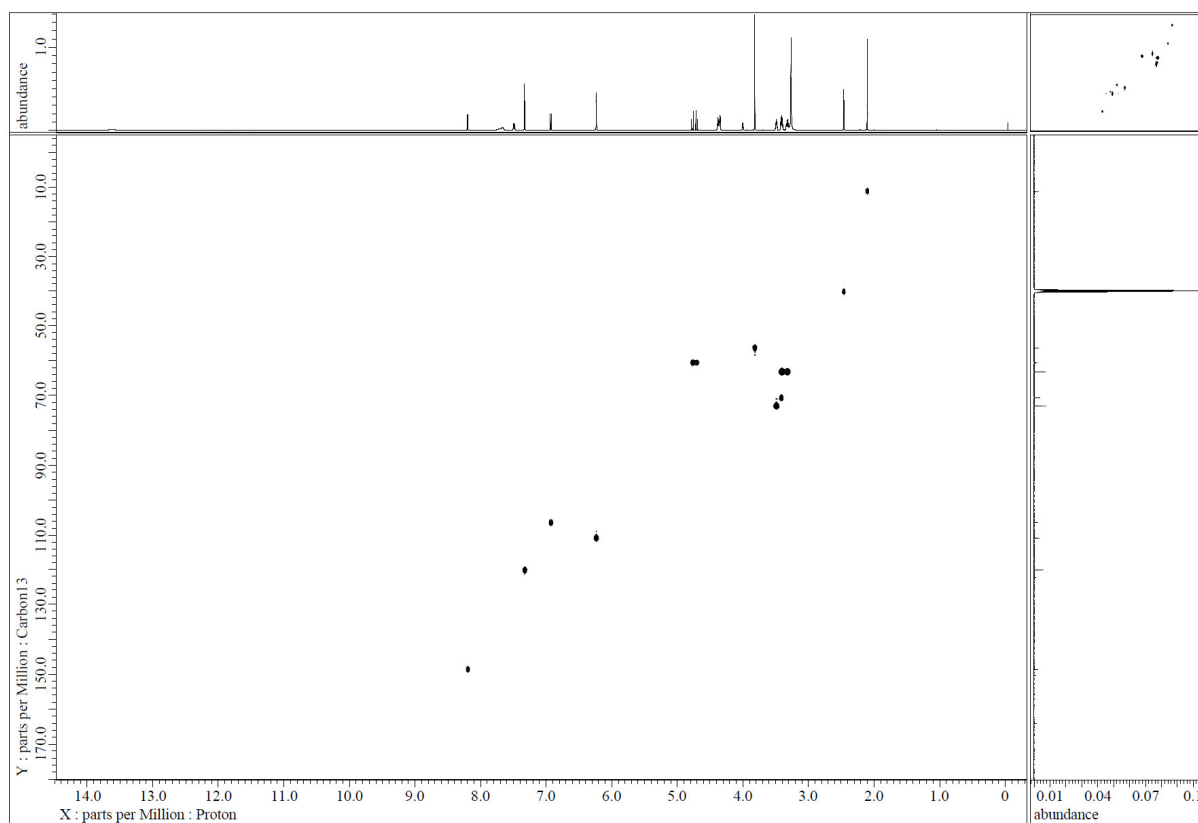

**Figure S19.** Solution-state 2D NMR ( $^1\text{H}$ - $^{13}\text{C}$  HSQC) of Ila/Xyl cocrystal

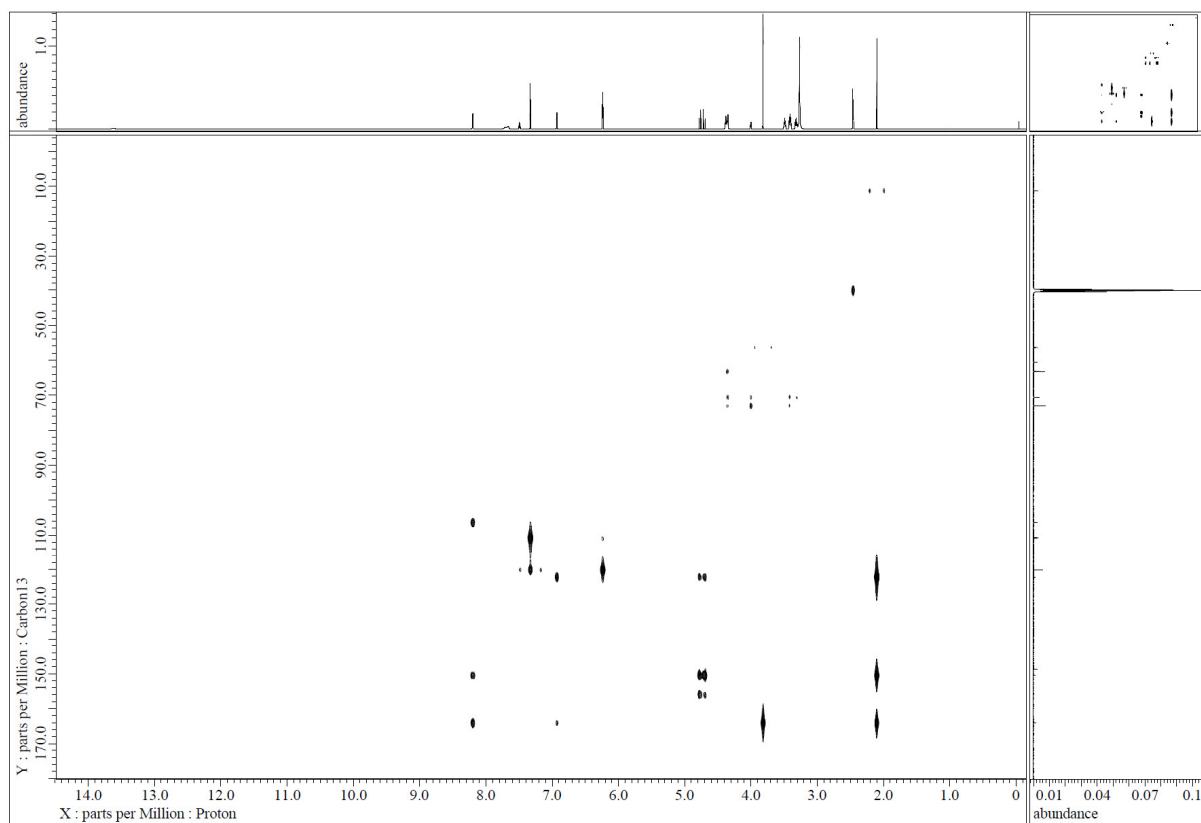

**Figure S20.** Solution-state 2D NMR ( $^1\text{H}$ - $^{13}\text{C}$  HMBC) of Ila/Xyl cocrystal
